# Supplementary material
Source: publisher figshare collection journal article supplement (https://sage.figshare.com/ndownloader/files/22306785)
Supplement: Supplementary file 1 [file 22306785]

**Supplemental Appendix 1: Template for developing your example of reflexivity**

**1. Introduce your example**

In a few sentences identify your area of health promotion work (academic/researcher, professional, program manager, practitioner, evaluator, teacher, trainer etc.) and the example in which you engaged or encountered reflexivity in your work. Tell us about your experience with reflexivity (subject dealing with, your role, goal of reflexivity). Below are some questions that might help you to write about your experience.

**2. Describe any challenges or barriers experienced in your example**

**3. Discuss what may have facilitated reflexivity in your example**

**Here are some questions to help stimulate the writing process to develop your example:**

*About your experience engaging reflexivity*

- What was your role in that?
- What happened in that experience/situation?
- Did you want to engage in the reflexivity process?

*About the use of reflexivity*

- Describe at what moment of the experience/situation reflexivity seemed important? Why? How did you deal with that?
- How was reflexivity important or not? For example, did you find it valuable to the work you were doing / to your objectives / your evaluation?
- Did you find it to be what you expected?

*About the possibilities of reflexivity*

- What has reflexivity facilitated in your work (e.g., are some things possible/clearer after the experience, that were not before)?
- How has being reflexive changed this situation (you, your team, the work)?
- What kinds of questions did this raise?
- Would you do this again? If so, would you do it differently? How?

*About the challenges and facilitators for reflexivity*

- What kinds of frustrations were encountered? By you? By others involved?
- What challenges or barriers did you encounter?
- What would have facilitated reflexivity in your work?
